# Supplementary material for: Sex and Race Differences in Obesity-Related Genetic Susceptibility and Risk of Cardiometabolic Disease in Older US Adults
Source: PubMed Central journal article supplement (PMC10709778; doi:10.1001/jamanetworkopen.2023.47171), 2023-12-08
Supplement: jamanetwopen-e2347171-s001.pdf [file jamanetwopen-e2347171-s001.pdf]

## Supplemental Online Content

Yu H, Armstrong N, Pavela G, Kaiser K. Race and sex differences in obesity-related genetic susceptibility and risk of cardiometabolic disease in older adults. *JAMA Netw Open*. 2023;6(12):e2347171. doi:10.1001/jamanetworkopen.2023.47171

**eTable 1.** Selected Obesity-Related Human Studies That Investigated 11 FTO SNVs for Further Analyses

**eAppendix.** Genotyping and Quality Control Details for REGARDS Participants

**eFigure 1.** Study Participant Selection

**eTable 2.** Comparisons of Effect Allele Frequencies of FTO SNVs Between Self-Identified Race Groups

**eTable 3.** Comparisons of Baseline Age, Income, Education Levels, Depression Score, and Stress Score Between Sex and Race Groups for BMI Analysis

**eTable 4.** Comparisons of Baseline Age, Income, Education Levels, Depression Score, and Stress Score Between Sex and Self-Identified Race Groups for Waist-to-Height Ratio Analysis

**eTable 5.** Results of Linkage Disequilibrium Among the 11 FTO SNVs in Self-Identified White Participants

**eTable 6.** Results of Linkage Disequilibrium Among the 11 FTO SNVs in Self-Identified Black Participants

**eTable 7.** Associations Between BMI and WHtR by FTO Proxy SNVs, Controlling for Sex (Females as the Reference Group) in Self-Identified Black Participants or White Participants

**eTable 8.** Interaction Terms Between FTO SNVs, Sex, and Age in Black Participants, Controlling for Psychosocial Status (Lower Education Levels and Lower Income Levels as the Reference Group)

**eTable 9.** Significant Interaction Terms Between FTO SNV rs1558902:A, Sex, and Age in White Participants, Controlling for Psychosocial Status (Lower Education Levels and Lower Income Levels as the Reference Group)

**eFigure 2.** Mediation Model of Obesity Indicators (BMI) in Relation With 6 FTO LD Block Proxy SNVs and Heart Disease in Black Participants

**eTable 10.** Interaction Terms Between Genetic Susceptibility by FTO SNV rs1121980: A and Sex in Black Participants

**eFigure 3.** Mediation Model of Obesity Indicators (BMI and WHtR) in Relation With FTO SNVs, and Hypertension/Diabetes in White Participants

**eTable 11.** Results of Mediation and Moderation analyses of BMI/WHtR, LD Block 1 (rs1558902:A), and Diabetes (No Diabetes as the Reference Group) in White Participants

This supplemental material has been provided by the authors to give readers additional information about their work.

**eTable 1. Selected Obesity-Related Human Studies That Investigated 11 *FTO* SNVs for Further Analyses**

| #  | FTO SNVs   | Studies                           | Study Participants                                                      | Study Designs           | Relevant Outcomes              |
|----|------------|-----------------------------------|-------------------------------------------------------------------------|-------------------------|--------------------------------|
| 1  | rs1558902  | (Wang, 2018) <sup>1</sup>         | 8828 European American women and 5218 European American men             | Prospective cohort      | BMI                            |
|    |            | (Bray, 2019) <sup>2</sup>         | 811 women and men, 80% with European identity                           | Randomized trial        | Fat mass                       |
| 2  | rs1121980  | (Wing, 2011) <sup>3</sup>         | 458 European Americans, 373 Latino Americans, and 288 African Americans | Cross-sectional         | BMI and acute insulin response |
|    |            | (Shimaoka, 2010) <sup>4</sup>     | 1514 Japanese adults                                                    | Cross-sectional         | Plasma glucose and BMI         |
| 3  | rs17817449 | (Nock, 2011) <sup>5</sup>         | 759 European Americans and 469 African Americans                        | Cross-sectional         | BMI                            |
|    |            | (Wang, 2011) <sup>6</sup>         | 1060 European Americans                                                 | Genome-wide association | BMI                            |
| 4  | rs8050136  | (Nock, 2011) <sup>5</sup>         | 759 European Americans and 469 African Americans                        | Cross-sectional         | BMI                            |
|    |            | (Wing, 2011) <sup>3</sup>         | 458 European Americans, 373 Latino Americans, and 288 African Americans | Cross-sectional         | BMI and acute insulin response |
| 5  | rs9935401  | (Holzapfel, 2011) <sup>7</sup>    | 6251 men and 6174 women in German                                       | Cross-sectional         | BMI                            |
|    |            | (Olza, 2013) <sup>8</sup>         | 534 children in Spain                                                   | Case-control            | BMI and CVD biomarkers         |
| 6  | rs3751812  | (Liaw, 2019) <sup>9</sup>         | 10,832 adults in Taiwan                                                 | Cross-sectional         | BMI                            |
|    |            | (Hassanein, 2010) <sup>10</sup>   | 10819 African Americans                                                 | Cross-sectional         | BMI                            |
| 7  | rs9936385  | (Zillikens, 2017) <sup>11</sup>   | 38,292 adults with European identity                                    | Meta-analysis           | Lean body mass                 |
|    |            | (Minohara, 2021) <sup>12</sup>    | 176 Japanese adults                                                     | Cross-sectional         | Lean body mass                 |
| 8  | rs9939609  | (Kilpeläinen, 2011) <sup>13</sup> | 218,166 adults and 19,268 children, 95% with European identity          | Meta-analysis           | BMI, WC, and fat percent       |
|    |            | (Naja, 2021) <sup>14</sup>        | 194 Emirati adults                                                      | Cross-sectional         | BMI                            |
| 9  | rs9941349  | (Hassanein, 2010) <sup>10</sup>   | 10819 African Americans                                                 | Cross-sectional         | BMI                            |
|    |            | (Yako, 2015) <sup>15</sup>        | 560 adults in South Africa with mixed identity                          | Cross-sectional         | BMI and type 2 diabetes        |
| 10 | rs9930506  | (Goutzelas, 2017) <sup>16</sup>   | 203 Greek adults                                                        | Cross-sectional         | BMI                            |
|    |            | (Naja, 2021) <sup>14</sup>        | 194 Emiratis                                                            | Cross-sectional         | BMI                            |
| 11 | rs9922708  | (McCaffery, 2013) <sup>17</sup>   | 1595 European Americans and 324 African Americans                       | Randomized trial        | Weight                         |
|    |            | (Helgeland, 2019) <sup>18</sup>   | 9286 Norwegian children                                                 | Genome-wide association | BMI                            |

## REFERENCES for eTable 1

1. Wang T, Heianza Y, Sun D, et al. Improving adherence to healthy dietary patterns, genetic risk, and long term weight gain: gene-diet interaction analysis in two prospective cohort studies. *BMJ*. Jan 10 2018;360:j5644. doi:10.1136/bmj.j5644
2. Bray GA, Krauss RM, Sacks FM, Qi L. Lessons Learned from the POUNDS Lost Study: Genetic, Metabolic, and Behavioral Factors Affecting Changes in Body Weight, Body Composition, and Cardiometabolic Risk. *Curr Obes Rep*. Sep 2019;8(3):262-283. doi:10.1007/s13679-019-00353-1
3. Wing MR, Ziegler JM, Langefeld CD, et al. Analysis of FTO gene variants with obesity and glucose homeostasis measures in the multiethnic Insulin Resistance Atherosclerosis Study cohort. *Int J Obes (Lond)*. Sep 2011;35(9):1173-82. doi:10.1038/ijo.2010.244
4. Shimaoka I, Kamide K, Ohishi M, et al. Association of gene polymorphism of the fat-mass and obesity-associated gene with insulin resistance in Japanese. *Hypertens Res*. Mar 2010;33(3):214-8. doi:10.1038/hr.2009.215
5. Nock NL, Plummer SJ, Thompson CL, Casey G, Li L. FTO polymorphisms are associated with adult body mass index (BMI) and colorectal adenomas in African-Americans. *Carcinogenesis*. May 2011;32(5):748-56. doi:10.1093/carcin/bgr026
6. Wang K, Li WD, Zhang CK, et al. A genome-wide association study on obesity and obesity-related traits. *PLoS One*. Apr 28 2011;6(4):e18939. doi:10.1371/journal.pone.0018939
7. Holzapfel C, Grallert H, Baumert J, et al. First investigation of two obesity-related loci (TMEM18, FTO) concerning their association with educational level as well as income: the MONICA/KORA study. *Journal of Epidemiology and Community Health (1979-)*. 2011;65(2):174-176.
8. Olza J, Ruperez AI, Gil-Campos M, et al. Influence of FTO variants on obesity, inflammation and cardiovascular disease risk biomarkers in Spanish children: a case-control multicentre study. *BMC Med Genet*. Dec 1 2013;14:123. doi:10.1186/1471-2350-14-123
9. Liaw YC, Liaw YP, Lan TH. Physical Activity Might Reduce the Adverse Impacts of the FTO Gene Variant rs3751812 on the Body Mass Index of Adults in Taiwan. *Genes (Basel)*. May 9 2019;10(5):354. doi:10.3390/genes10050354
10. Hassanein MT, Lyon HN, Nguyen TT, et al. Fine mapping of the association with obesity at the FTO locus in African-derived populations. *Hum Mol Genet*. Jul 15 2010;19(14):2907-16. doi:10.1093/hmg/ddq178
11. Zillikens MC, Demissie S, Hsu YH, et al. Large meta-analysis of genome-wide association studies identifies five loci for lean body mass. *Nat Commun*. Jul 19 2017;8(1):80. doi:10.1038/s41467-017-00031-7
12. Minohara T, Noso S, Babaya N, et al. Associations between genetic loci related to lean mass and body composition in type 2 diabetes patients. *Geriatrics & Gerontology International*. 08/01 2021;21doi:10.1111/ggi.14259
13. Kilpeläinen TO, Qi L, Brage S, et al. Physical activity attenuates the influence of FTO variants on obesity risk: a meta-analysis of 218,166 adults and 19,268 children. *PLoS medicine*. 2011;8(11):e1001116-e1001116. doi:10.1371/journal.pmed.1001116
14. Naja F, Itani L, Hammoudeh S, et al. Dietary Patterns and Their Associations With the FTO and FGF21 Gene Variants Among Emirati Adults. *Front Nutr*. 2021;8:668901. doi:10.3389/fnut.2021.668901

15. Yako YY, Madubedube JH, Kengne AP, Erasmus RT, Pillay TS, Matsha TE. Contribution of ENPP1, TCF7L2, and FTO polymorphisms to type 2 diabetes in mixed race ethnic population of South Africa. *Afr Health Sci*. Dec 2015;15(4):1149-60. doi:10.4314/ahs.v15i4.14
16. Goutzelas Y, Kotsa K, Vasilopoulos Y, et al. Association analysis of FTO gene polymorphisms with obesity in Greek adults. *Gene*. May 20 2017;613:10-13. doi:10.1016/j.gene.2017.02.033
17. McCaffery JM, Papandonatos GD, Huggins GS, et al. FTO predicts weight regain in the Look AHEAD clinical trial. *Int J Obes (Lond)*. Dec 2013;37(12):1545-52. doi:10.1038/ijo.2013.54
18. Helgeland O, Vaudel M, Juliusson PB, et al. Genome-wide association study reveals dynamic role of genetic variation in infant and early childhood growth. *Nat Commun*. Oct 1 2019;10(1):4448. doi:10.1038/s41467-019-12308-0

## **eAppendix. Genotyping and Quality Control Details for REGARDS Participants**

An initial subset of 10,656 REGARDS participants (8,916 AA and 1,740 EA) underwent genotyping using Illumina Infinium Multi-Ethnic AMR/AFR BeadChip arrays (Illumina, Inc, San Diego, CA) as previously described<sup>1,2</sup>. Quality control at both the sample and variant levels was performed. Samples were removed if they were internal duplicates, HapMap controls, sex mismatches, or exhibited a high proportion of missing variants<sup>1,2</sup>. Genotype imputation was performed using the BioData Catalyst imputation server and the Trans-omics for Precision Medicine (TOPMed) release 2 (Freeze 8) reference panel<sup>3</sup>. Principal component analysis was performed using EIGENSTRAT SmartPCA software, and individuals were considered outliers and removed from subsequent analysis if they were outside of six standard deviations<sup>4</sup>. PLINK version 1.9 was used to code the genotypes as additive allele dosages for the *FTO* SNPs<sup>5</sup>.

### **References**

1. Armstrong ND, Srinivasasainagendra V, Patki A, et al. Genetic Contributors of Incident Stroke in 10,700 African Americans With Hypertension: A Meta-Analysis From the Genetics of Hypertension Associated Treatments and Reasons for Geographic and Racial Differences in Stroke Studies. *Front Genet.* 2021;12:781451. doi:10.3389/fgene.2021.781451
2. Parcha V, Malla G, Irvin MR, et al. Association of Transthyretin Val122Ile Variant With Incident Heart Failure Among Black Individuals. *JAMA.* Apr 12 2022;327(14):1368-1378. doi:10.1001/jama.2022.2896
3. Das S, Forer L, Schonherr S, et al. Next-generation genotype imputation service and methods. *Nat Genet.* Oct 2016;48(10):1284-1287. doi:10.1038/ng.3656
4. Price AL, Patterson NJ, Plenge RM, Weinblatt ME, Shadick NA, Reich D. Principal components analysis corrects for stratification in genome-wide association studies. *Nat Genet.* Aug 2006;38(8):904-9. doi:10.1038/ng1847
5. Chang CC, Chow CC, Tellier LC, Vattikuti S, Purcell SM, Lee JJ. Second-generation PLINK: rising to the challenge of larger and richer datasets. *Gigascience.* 2015;4:7. doi:10.1186/s13742-015-0047-8

**eFigure 1. Study Participant Selection**

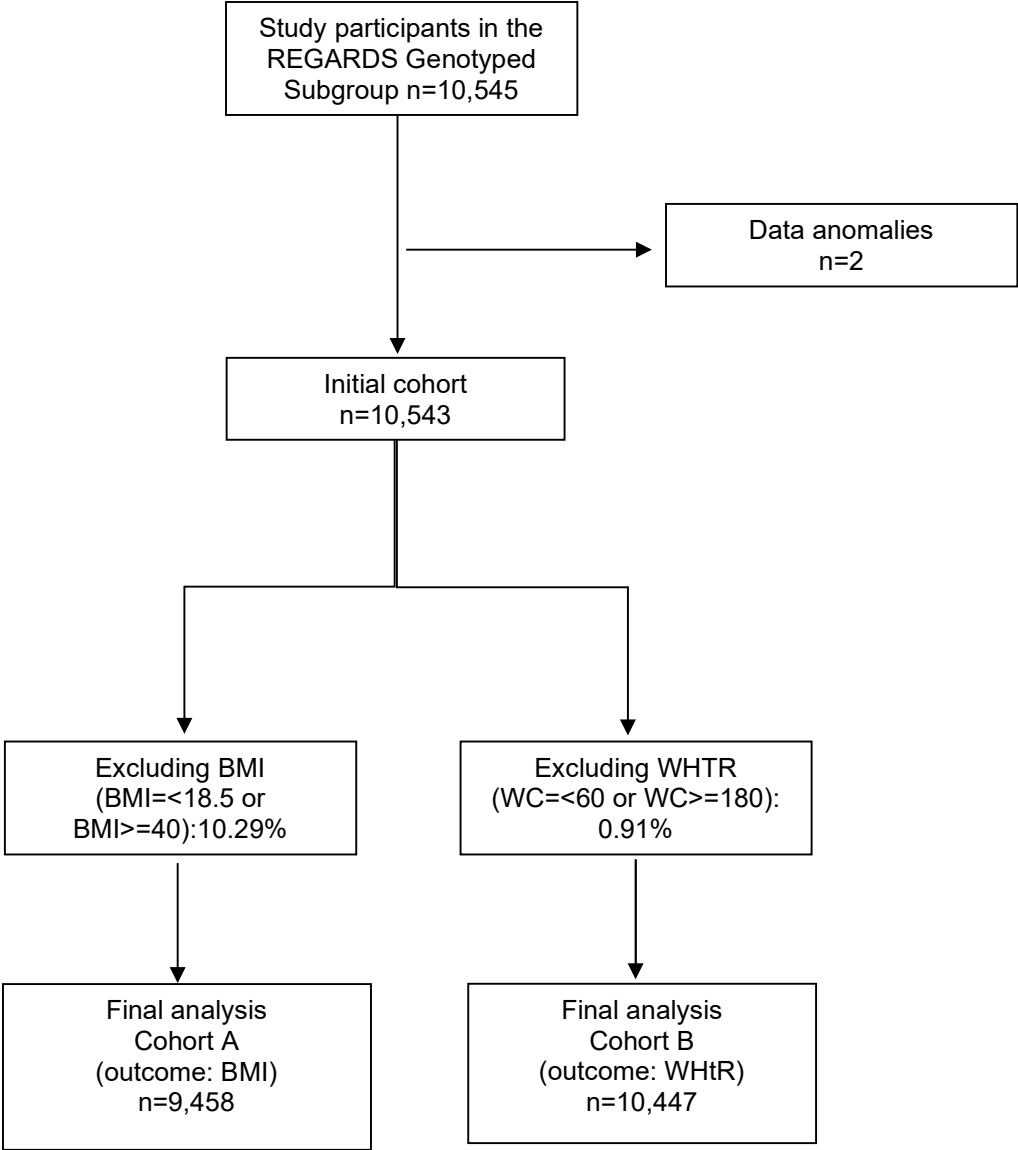

**eTable 2. Comparisons of Effect Allele Frequencies of *FTO* SNVs Between Self-Identified Race Groups (Cohort A: BMI, N=9,458; Cohort B: Waist to Height Ratio (WHtR), N=10,447).**

| <b>Cohort A: BMI analysis</b>  |                      |                         |                         |
|--------------------------------|----------------------|-------------------------|-------------------------|
| <b><i>FTO</i> SNVs</b>         | <b>Effect Allele</b> | <b>Black</b><br>N=7,832 | <b>White</b><br>N=1,626 |
|                                |                      | <b>Percent</b>          | <b>Percent</b>          |
| rs1558902                      | A                    | 11.10                   | 40.43                   |
| rs1121980                      | A                    | 47.26                   | 42.68                   |
| rs17817449                     | G                    | 39.38                   | 40.01                   |
| rs8050136                      | A                    | 43.62                   | 40.01                   |
| rs9935401                      | A                    | 43.95                   | 40.03                   |
| rs3751812                      | T                    | 10.80                   | 39.51                   |
| rs9936385                      | C                    | 47.73                   | 40.04                   |
| rs9939609                      | A                    | 47.72                   | 40.01                   |
| rs9941349                      | T                    | 18.72                   | 41.36                   |
| rs9930506                      | G                    | 21.18                   | 43.30                   |
| rs9922708                      | T                    | 21.11                   | 43.39                   |
| <b>Cohort B: WHtR analysis</b> |                      |                         |                         |
| <b><i>FTO</i> SNVs</b>         |                      | <b>Black</b><br>N=8,743 | <b>White</b><br>N=1,704 |
|                                |                      | <b>Percent</b>          | <b>Percent</b>          |
| rs1558902                      | A                    | 11.17                   | 40.29                   |
| rs1121980                      | A                    | 47.25                   | 42.55                   |
| rs17817449                     | G                    | 39.40                   | 39.88                   |
| rs8050136                      | A                    | 43.6                    | 39.91                   |
| rs9935401                      | A                    | 40.00                   | 39.94                   |
| rs3751812                      | T                    | 10.85                   | 39.38                   |
| rs9936385                      | C                    | 47.75                   | 39.94                   |
| rs9939609                      | A                    | 47.74                   | 39.91                   |
| rs9941349                      | T                    | 18.84                   | 41.20                   |
| rs9930506                      | G                    | 21.18                   | 43.30                   |
| rs9922708                      | T                    | 21.26                   | 43.08                   |



**eTable 3. Comparisons of Baseline Age, Income, Education Levels, Depression Score, and Stress Score Between Sex and Race Groups for BMI Analysis (Cohort A, N=9,458, excluding cases analysis by analysis for Body Mass Index).**

|                                                                                                         | Race             |         |                  |         | ANOVA      |            | Sex               |       |                 |          | ANOVA      |            |
|---------------------------------------------------------------------------------------------------------|------------------|---------|------------------|---------|------------|------------|-------------------|-------|-----------------|----------|------------|------------|
| <b>Age (years)</b><br>Range                                                                             | Black<br>n=7,832 |         | White<br>n=1,626 |         |            |            | Female<br>n=5,276 |       | Male<br>n=4,182 |          |            |            |
|                                                                                                         | M                | SD      | M                | SD      | F          | <i>p</i> † | M                 | SD    | M               | SD       | F          | <i>p</i>   |
|                                                                                                         | 63.91<br>45-94   | 9.23    | 68.6<br>45-98    | 10.39   | 336.289    | <0.001     | 64.4<br>45-94     | 9.71  | 65.2<br>45-98   | 9.47     | 8.250,     | <0.001     |
| <b>Depression score</b><br>Range                                                                        | Black<br>n=7,621 |         | White<br>n=1,588 |         |            |            | Female<br>n=5,133 |       | Male<br>n=4,076 |          |            |            |
|                                                                                                         | M                | SD      | M                | SD      | F          | <i>p</i> † | M                 | SD    | M               | SD       | F          | <i>p</i> † |
|                                                                                                         | 1.32<br>0-12     | 2.18    | 1.06<br>0-12     | 1.96    | 23.656     | <0.001     | 1.51<br>0-12      | 2.33  | .98<br>0-12     | 1.85     | 138.31,    | <0.001     |
| <b>Perceived Stress score</b><br>Range                                                                  | Black<br>n=7,665 |         | White<br>n=1,598 |         |            |            | Female<br>n=5,164 |       | Male<br>n=4,099 |          |            |            |
|                                                                                                         | M                | SD      | M                | SD      | F          | <i>p</i> † | M                 | SD    | M               | SD       | F          | <i>p</i> † |
|                                                                                                         | 5.82<br>0-16     | 2.65    | 5.47<br>0-16     | 2.31    | 20.530     | <0.001     | 6.06<br>0-16      | 2.63  | 5.39<br>0-16    | 2.50     | 153.50,    | <0.001     |
|                                                                                                         | Race             |         |                  |         | Chi-Square |            | Sex               |       |                 |          | Chi-Square |            |
| <b>Education</b><br>Less than high school<br>High school<br>Some college<br>College graduate &<br>above | Black<br>n=7,824 |         | White<br>n=1,624 |         |            |            | Female<br>n=5,269 |       | Male<br>n=4,179 |          |            |            |
|                                                                                                         | Count            | Percent | Count            | Percent | <i>p</i>   | Count      | Percent           | Count | Percent         | <i>p</i> |            |            |
|                                                                                                         | 1389             | 17.8    | 139              | 8.6     | <0.001     | 864        | 16.4              | 664   | 15.9            | 0.043    |            |            |
|                                                                                                         | 2143             | 27.4    | 386              | 23.8    |            | 1446       | 27.4              | 1083  | 25.9            |          |            |            |
|                                                                                                         | 2116             | 27.0    | 457              | 28.1    |            | 1449       | 27.5              | 1124  | 26.9            |          |            |            |
| 2176                                                                                                    | 27.8             | 642     | 39.5             |         | 1510       | 28.7       | 1308              | 31.3  |                 |          |            |            |
| <b>Income</b><br>Below \$20K<br>20K-34K<br>35K-74K<br>75K & above                                       | Black<br>n=6,905 |         | White<br>n=1,421 |         |            |            | Female<br>n=4,544 |       | Male<br>n=3,782 |          |            |            |
|                                                                                                         | Count            | Percent | Count            | Percent | <i>p</i>   | Count      | Percent           | Count | Percent         | <i>p</i> |            |            |
|                                                                                                         | 1926             | 27.9    | 222              | 15.6    | <0.001     | 1442       | 31.7              | 706   | 18.7            | <0.001   |            |            |
|                                                                                                         | 2081             | 30.1    | 383              | 27.0    |            | 1393       | 30.7              | 1071  | 28.3            |          |            |            |
|                                                                                                         | 2134             | 30.9    | 540              | 38.0    |            | 1316       | 29.0              | 1358  | 35.9            |          |            |            |
| 764                                                                                                     | 11.1             | 276     | 19.4             |         | 393        | 8.6        | 647               | 17.1  |                 |          |            |            |

† Welch tests performed for groups with unequal variances based on results from Levene's tests.

**eTable 4. Comparisons of Baseline Age, Income, Education Levels, Depression Score, and Stress Score Between Sex and Self-Identified Race Groups for Waist-to-Height Ratio Analysis (Cohort B, N=10,447, excluding cases analysis by analysis for Waist to Height Ratio).**

|                               | Race                  |         |                  |         | ANOVA      |            | Sex               |         |                 |         | ANOVA      |            |
|-------------------------------|-----------------------|---------|------------------|---------|------------|------------|-------------------|---------|-----------------|---------|------------|------------|
| <b>Age (years)</b>            | Black<br>n=8,743      |         | White<br>n=1,704 |         |            |            | Female<br>n=5,276 |         | Male<br>n=4,182 |         |            |            |
|                               | M                     | SD      | M                | SD      | F          | <i>p</i> † | M                 | SD      | M               | SD      | F          | <i>p</i>   |
|                               | 63.6                  | 9.19    | 68.4             | 10.35   | 377.337    | <0.001     | 63.9              | 9.59    | 65.0            | 9.48    | 33.241     | <0.001     |
| Range                         | 45-96                 |         | 45-98            |         |            |            | 45-96             |         | 45-98           |         |            |            |
| <b>Depression score</b>       | Black<br>n=8,492      |         | White<br>n=1,664 |         |            |            | Female<br>n=5,869 |         | Male<br>n=4,287 |         |            |            |
|                               | M                     | SD      | M                | SD      | F          | <i>p</i> † | M                 | SD      | M               | SD      | F          | <i>p</i> † |
|                               | 1.4                   | 2.21    | 1.1              | 1.98    | 22.604     | <0.001     | 1.5               | 2.36    | 1.0             | 1.87    | 155.090    | <0.001     |
| Range                         | 0-12                  |         | 0-12             |         |            |            | 0-12              |         | 0-12            |         |            |            |
| <b>Perceived Stress score</b> | Black<br>n=8,549      |         | White<br>n=1,675 |         |            |            | Female<br>n=5,908 |         | Male<br>n=4,316 |         |            |            |
|                               | M                     | SD      | M                | SD      | F          | <i>p</i> † | M                 | SD      | M               | SD      | F          | <i>p</i> † |
|                               | 5.8                   | 2.65    | 5.5              | 2.31    | 23.492     | <0.001     | 6.07              | 2.63    | 1.54            | 2.36    | 165.669    | <0.001     |
| Range                         | 0-16                  |         | 0-16             |         |            |            | 0-16              |         | 0-16            |         |            |            |
|                               | Race                  |         |                  |         | Chi-Square |            | Sex               |         |                 |         | Chi-Square |            |
| <b>Education</b>              | Black<br>n=7,824      |         | White<br>n=1,624 |         |            |            | Female<br>n=5,269 |         | Male<br>n=4,179 |         |            |            |
|                               | Count                 | Percent | Count            | Percent | <i>p</i>   |            | Count             | Percent | Count           | Percent | <i>p</i>   |            |
|                               | Less than high school | 1570    | 18.0             | 153     | 9.0        | <0.001     | 1017              | 16.8    | 706             | 16.0    | 0.043      |            |
|                               | High school           | 2410    | 27.6             | 407     | 23.9       |            | 1667              | 27.6    | 1150            | 26.1    |            |            |
|                               | Some college          | 2385    | 27.3             | 479     | 28.1       |            | 1680              | 27.8    | 1184            | 41.3    |            |            |
| College graduate & above      | 2370                  | 27.1    | 663              | 39.0    |            | 1672       | 27.7              | 1361    | 30.9            |         |            |            |
| <b>Income</b>                 | Black<br>n=6,905      |         | White<br>n=1,421 |         |            |            | Female<br>n=4,544 |         | Male<br>n=3,782 |         |            |            |
|                               | Count                 | Percent | Count            | Percent | <i>p</i>   |            | Count             | Percent | Count           | Percent | <i>p</i>   |            |
|                               | Below \$20K           | 2216    | 24.1             | 241     | 16.2       | <0.001     | 1697              | 32.6    | 760             | 19.1    | <0.001     |            |
|                               | 20K-34K               | 2319    | 30.1             | 403     | 27.1       |            | 1599              | 30.8    | 1123            | 28.2    |            |            |
|                               | 35K-74K               | 2342    | 30.4             | 562     | 37.8       |            | 1475              | 28.4    | 1429            | 35.9    |            |            |
| 75K & above                   | 820                   | 10.7    | 282              | 19.0    |            | 428        | 8.2               | 674     | 16.9            |         |            |            |

† Welch tests performed for groups with unequal variances based on results from Levene's tests.

**eTable 5. Results of Linkage Disequilibrium Among the 11 *FTO* SNVs in Self-Identified White Participants**

| <b>FTO SNVs</b>   | rs1558902 | rs1121980 | rs17817449 | rs8050136 | rs9935401 | rs3751812 | rs9936385 | rs9939609 | rs9941349 | rs9930506 | rs9922708 |
|-------------------|-----------|-----------|------------|-----------|-----------|-----------|-----------|-----------|-----------|-----------|-----------|
| <b>rs1558902</b>  | 1         | 0.9067    | 0.9421     | 0.9370    | 0.9382    | 0.9590    | 0.9357    | 0.9344    | 0.8836    | 0.8169    | 0.8136    |
| <b>rs1121980</b>  | 0.9067    | 1         | 0.8938     | 0.8913    | 0.8900    | 0.8717    | 0.8875    | 0.8888    | 0.9425    | 0.8724    | 0.8688    |
| <b>rs17817449</b> | 0.9421    | 0.8938    | 1          | 0.994     | 0.9935    | 0.9729    | 0.9909    | 0.9922    | 0.9078    | 0.8387    | 0.8354    |
| <b>rs8050136</b>  | 0.9370    | 0.8913    | 0.9948     | 1         | 0.9987    | 0.9729    | 0.9961    | 0.9974    | 0.9078    | 0.8411    | 0.8378    |
| <b>rs9935401</b>  | 0.9383    | 0.8900    | 0.9935     | 0.9987    | 1         | 0.9742    | 0.9974    | 0.9961    | 0.9065    | 0.8398    | 0.8365    |
| <b>rs3751812</b>  | 0.9590    | 0.8717    | 0.9729     | 0.9729    | 0.9742    | 1         | 0.9768    | 0.9755    | 0.9226    | 0.8541    | 0.8508    |
| <b>rs9936385</b>  | 0.9357    | 0.8875    | 0.9909     | 0.9961    | 0.9974    | 0.9768    | 1         | 0.9987    | 0.9090    | 0.8423    | 0.8389    |
| <b>rs9939609</b>  | 0.9344    | 0.8888    | 0.9922     | 0.9974    | 0.9961    | 0.9755    | 0.9987    | 1         | 0.9103    | 0.8436    | 0.8403    |
| <b>rs9941349</b>  | 0.8836    | 0.9425    | 0.9078     | 0.9078    | 0.9065    | 0.9226    | 0.9090    | 0.9103    | 1         | 0.9260    | 0.9224    |
| <b>rs9930506</b>  | 0.8169    | 0.8724    | 0.8387     | 0.8411    | 0.8398    | 0.8541    | 0.8423    | 0.8436    | 0.9260    | 1         | 0.9961    |
| <b>rs9922708</b>  | 0.8136    | 0.8688    | 0.8354     | 0.8378    | 0.8365    | 0.8508    | 0.8389    | 0.8403    | 0.9224    | 0.9961    | 1         |

**eTable 6. Results of Linkage Disequilibrium Among the 11 *FTO* SNVs in Self-Identified Black Participants**

| <b>FTO SNVs</b>                                                                                              | rs1558902   | rs1121980 | rs17817449 | rs8050136 | rs9935401 | rs3751812 | rs9936385 | rs9939609 | rs9941349 | rs9930506 | rs9922708 |
|--------------------------------------------------------------------------------------------------------------|-------------|-----------|------------|-----------|-----------|-----------|-----------|-----------|-----------|-----------|-----------|
| <b>rs1558902</b>                                                                                             | 1           | 0.1328    | 0.1739     | 0.1441    | 0.1429    | 0.9638    | 0.1214    | 0.1211    | 0.4955    | 0.4170    | 0.4190    |
| <b>rs1121980</b>                                                                                             | 0.1328      | 1         | 0.7206     | 0.7307    | 0.7206    | 0.1326    | 0.5951    | 0.5949    | 0.1476    | 0.1800    | 0.1792    |
| <b>rs17817449</b>                                                                                            | 0.1739      | 0.7206    | 1          | 0.8374    | 0.8254    | 0.1836    | 0.7073    | 0.7071    | 0.0411    | 0.0210    | 0.0216    |
| <b>rs8050136</b>                                                                                             | 0.1441      | 0.7307    | 0.8374     | 1         | 0.9852    | 0.1537    | 0.8441    | 0.8445    | 0.0623    | 0.0938    | 0.0935    |
| <b>rs9935401</b>                                                                                             | 0.1429      | 0.7206    | 0.8254     | 0.9852    | 1         | 0.1521    | 0.8539    | 0.8534    | 0.0608    | 0.0925    | 0.0915    |
| <b>rs3751812</b>                                                                                             | 0.9638      | 0.1326    | 0.1836     | 0.1537    | 0.1521    | 1         | 0.1305    | 0.1301    | 0.5192    | 0.4385    | 0.4405    |
| <b>rs9936385</b>                                                                                             | 0.1214      | 0.5950    | 0.7073     | 0.8441    | 0.8539    | 0.1305    | 1         | 0.9995    | 0.0435    | 0.0691    | 0.0683    |
| <b>rs9939609</b>                                                                                             | 0.1211      | 0.5949    | 0.7071     | 0.8445    | 0.8534    | 0.1301    | 0.9995    | 1         | 0.0436    | 0.0692    | 0.0684    |
| <b>rs9941349</b>                                                                                             | 0.4955      | 0.1476    | 0.0411     | 0.0623    | 0.0608    | 0.5192    | 0.0435    | 0.0436    | 1         | 0.7839    | 0.7867    |
| <b>rs9930506</b>                                                                                             | 0.4170      | 0.1800    | 0.0210     | 0.0938    | 0.0925    | 0.4385    | 0.0691    | 0.0692    | 0.7839    | 1         | 0.9958    |
| <b>rs9922708</b>                                                                                             | 0.4190      | 0.1792    | 0.0216     | 0.0935    | 0.0915    | 0.4405    | 0.068     | 0.0684    | 0.7867    | 0.9958    | 1         |
| <b>LD Block – first SNP from each LD block listed (<math>r^2&gt;0.8</math>) used as proxy denoted with *</b> |             |           |            |           |           |           |           |           |           |           |           |
| <b>LD Block 1</b>                                                                                            | rs1558902*  | rs3751812 |            |           |           |           |           |           |           |           |           |
| <b>LD Block 2</b>                                                                                            | rs1121980*  |           |            |           |           |           |           |           |           |           |           |
| <b>LD Block 3</b>                                                                                            | rs17817449* |           |            |           |           |           |           |           |           |           |           |
| <b>LD Block 4</b>                                                                                            | rs8050136*  | rs9935401 | rs9936385  | rs9939609 |           |           |           |           |           |           |           |
| <b>LD Block 5</b>                                                                                            | rs9941349*  |           |            |           |           |           |           |           |           |           |           |
| <b>LD Block 6</b>                                                                                            | rs9930506*  | rs9922708 |            |           |           |           |           |           |           |           |           |

**eTable 7. Associations Between BMI and WHtR by FTO Proxy SNVs, Controlling for Sex (Females as the Reference Group) in Self-Identified Black Participants or White Participants**  
**For Black participants, Bonferroni corrected significance level at 0.00833+; for White participants, Bonferroni corrected significance level at 0.05\***

| Black participants | BMI as a dependent variable † |        | WHtR as a dependent variable† |        |
|--------------------|-------------------------------|--------|-------------------------------|--------|
|                    | FTO                           | Sex    | FTO                           | Sex    |
|                    | P                             | P      | P                             | P      |
| <b>rs1558902</b>   | 0.004+                        | <.001  | 0.015                         | <.001  |
| <b>rs1121980</b>   | 0.104                         | <.001  | 0.666                         | <.001  |
| <b>rs17817449</b>  | 0.307                         | <.001  | 0.814                         | <.001  |
| <b>rs8050136</b>   | 0.340                         | <.001  | 0.449                         | <.001  |
| <b>rs9941349*</b>  | 0.006+                        | <.001  | 0.078                         | <.001  |
| <b>rs9930506*</b>  | 0.022                         | <.001  | 0.041                         | <.001  |
| White participants | BMI as a dependent variable†  |        | WHtR as a dependent variable† |        |
|                    | FTO                           | Sex    | FTO                           | Sex    |
|                    | P                             | P      | P                             | P      |
| <b>rs1558902</b>   | 0.0020*                       | 0.1057 | 0.0186*                       | 0.1106 |

† General linear model: Obesity indicator = intercept + FTO + sex + PC 1-10 + error

**eTable 8. Interaction Terms Between FTO SNVs, Sex, and Age in Black Participants, Controlling for Psychosocial Status (Lower Education Levels and Lower Income Levels as the Reference Group) (outcome: BMI/WHtR, Bonferroni corrected significance level at 0.00833).**

| BMI†       | FTO* Sex |       | FTO* Age |       |
|------------|----------|-------|----------|-------|
|            | Beta     | P     | Beta     | P     |
| rs1558902  | 0.151    | 0.561 | -0.022   | 0.134 |
| rs1121980  | -0.299   | 0.077 | -0.012   | 0.188 |
| rs17817449 | -0.280   | 0.104 | -0.017   | 0.077 |
| rs8050136  | -0.252   | 0.138 | -0.019   | 0.042 |
| rs9941349  | 0.151    | 0.277 | -0.011   | 0.299 |
| rs9930506  | 0.169    | 0.405 | -0.011   | 0.337 |
| WHtR‡      | FTO* Sex |       | FTO* Age |       |
|            | Beta     | P     | Beta     | P     |
| rs1558902  | 0.006    | 0.173 | 0.000    | 0.899 |
| rs1121980  | -0.002   | 0.410 | 0.000    | 0.766 |
| rs17817449 | 0.001    | 0.642 | 0.000    | 0.310 |
| rs8050136  | -0.002   | 0.550 | 0.000    | 0.336 |
| rs9941349  | 0.004    | 0.270 | 0.000    | 0.290 |
| rs9930506  | 0.003    | 0.160 | 0.000    | 0.747 |

† General linear model: Obesity indicator (BMI) = intercept +FTO SNP LD Block) + sex + FTO SNP\* Sex (or FTO\* Age) + age + income + education + stress + depression + PC 1-10 + error

‡ General linear model: Obesity indicator (WHtR) = intercept + FTO SNP LD Block + sex + FTO SNP\* Sex (or FTO\* Age) + age + income + education + stress + depression + PC 1-10 + error

**eTable 9. Significant Interaction Terms Between *FTO* SNV rs1558902:A, Sex, and Age in White Participants, Controlling for Psychosocial Status (Lower Education Levels and Lower Income Levels as the Reference Group) (outcome: BMI/WHtR, Bonferroni corrected significance level at 0.05).**

| BMI†                        | FTO* Sex |        | FTO* Age |        |
|-----------------------------|----------|--------|----------|--------|
|                             | Beta     | P      | Beta     | P      |
| LD Block 1<br>(rs1558902:A) | 0.781    | <0.001 | -0.057   | <0.001 |
| WHtR‡                       | FTO* Sex |        | FTO* Age |        |
|                             | Beta     | P      | Beta     | P      |
| LD Block 1<br>(rs1558902:A) | 0.018    | <0.001 | -0.001   | 0.017  |

† General linear model: Obesity indicator (BMI) = intercept +FTO SNP + sex + FTO SNP\* Sex (or FTO\* Age) + age + income + education + stress + depression + PC 1-10 + error

‡ General linear model: Obesity indicator (WHtR) = intercept + FTO SNP + sex + FTO SNP\* Sex (or FTO\* Age) + age + income + education + stress + depression + PC 1-10 + error

**eFigure 2. Mediation Model of Obesity Indicators (BMI) in Relation With 6 *FTO* LD Block Proxy SNVs and Heart Disease in Black Participants (Bonferroni corrected significance level = 0.00833).**

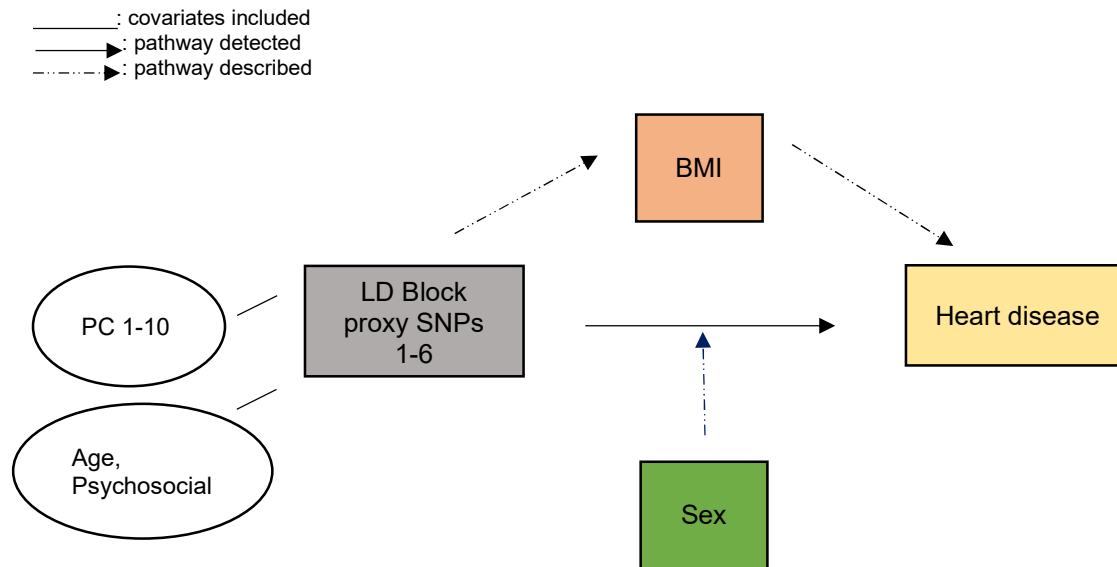



**eTable 10. Interaction Terms Between Genetic Susceptibility by *FTO* SNV rs1121980: A and Sex in Black Participants**  
**(outcome: heart disease, no heart disease as the reference group, Bonferroni corrected significance level at 0.00833). Others tested were not significant (data not shown).**

| Heart disease †            | FTO* Sex |       |
|----------------------------|----------|-------|
|                            | Coeff.   | p     |
| LD Block 2<br>rs1121980: A | 0.030    | 0.760 |

† Binary logistic model: heart disease= intercept + *FTO* SNPs + sex + *FTO* SNPs\* Sex + age + income + education + stress + depression + PC 1-10 + error

**eFigure 3. Mediation Model of Obesity Indicators (BMI and WHtR) in Relation With FTO SNVs, and Hypertension/Diabetes in White Participants (significance level = 0.05).**

—: covariates included  
—▶: pathway detected  
- - - -▶: pathway described

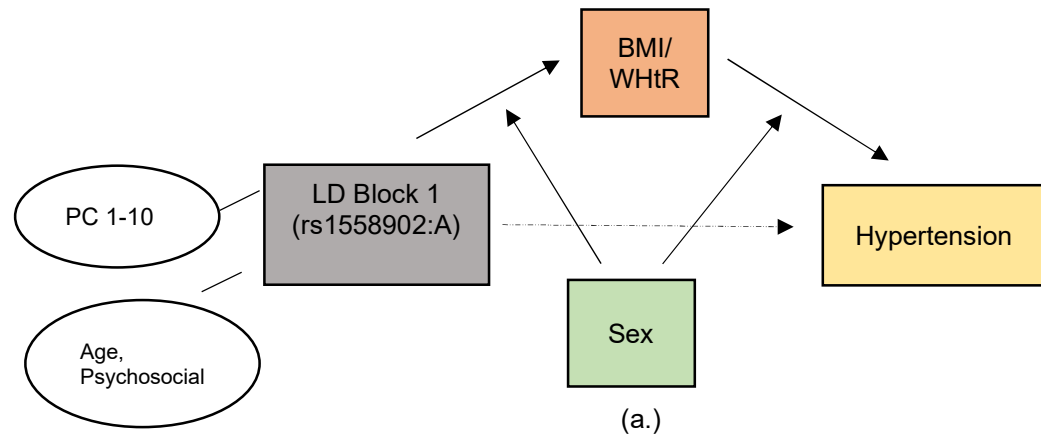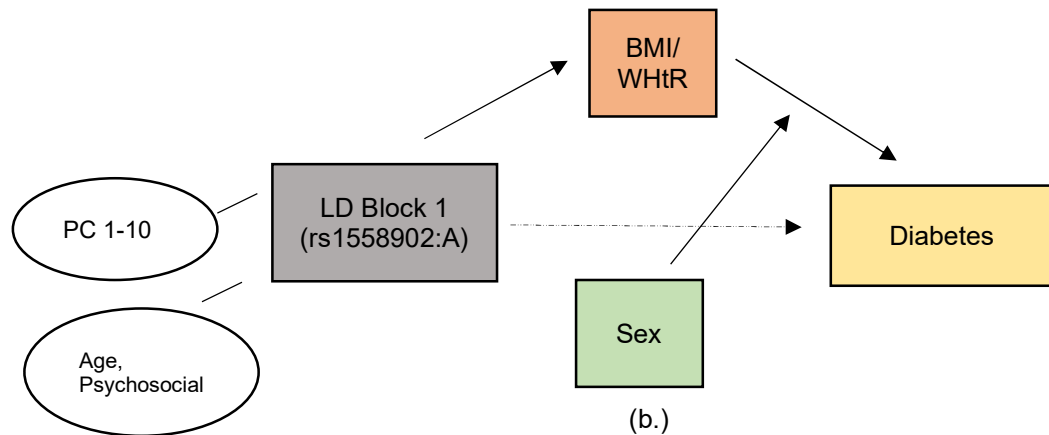

**eTable 11. Results of Mediation and Moderation analyses of BMI/WHtR, LD Block 1 (rs1558902:A), and Diabetes (No Diabetes as the Reference Group) in White Participants**

| <b>Model 3</b>             |                |                                            |        |        |                     |                                  |        |                 |
|----------------------------|----------------|--------------------------------------------|--------|--------|---------------------|----------------------------------|--------|-----------------|
|                            |                | <b>Consequent</b>                          |        |        |                     |                                  |        |                 |
|                            |                | <b>M (BMI)</b>                             |        |        | <b>Y (Diabetes)</b> |                                  |        |                 |
| <b>Antecedent</b>          |                | Coeff.                                     | SE     | p      | C'                  | Coeff.                           | SE     | p               |
| X LD Block 1 (rs1558902:A) | a              | 0.4762                                     | 0.1768 | 0.0072 | C'                  | 0.0753                           | 0.1093 | 0.491           |
| M (BMI)                    |                | -                                          | -      | -      | b                   | 0.1382                           | 0.0171 | <0.001          |
| Constant                   | i <sub>m</sub> | 33.4239                                    | 1.5708 | <0.001 | i <sub>y</sub>      | -5.2693                          | 1.1713 | <0.001          |
|                            |                | R <sup>2</sup> = 0.0615, F=4.9830, p<0.001 |        |        |                     | R <sup>2</sup> = 0.1220, p<0.001 |        |                 |
|                            |                | Coeff.                                     | SE     | p      |                     | Coeff.                           | SE     | 95% CI          |
| <b>Moderation</b>          |                |                                            |        |        |                     |                                  |        |                 |
| W (sex)                    |                | -                                          | -      | -      | W*M female          | 0.0689                           | 0.0288 | 0.0193 - 0.1309 |
|                            |                |                                            |        |        | male                | 0.0633                           | 0.0264 | 0.0187 - 0.1208 |
|                            |                |                                            |        |        |                     | Index = - 0.0056                 |        |                 |
| <b>Model 4</b>             |                |                                            |        |        |                     |                                  |        |                 |
|                            |                | <b>Consequent</b>                          |        |        |                     |                                  |        |                 |
|                            |                | <b>M (WHtR)</b>                            |        |        | <b>Y (Diabetes)</b> |                                  |        |                 |
| <b>Antecedent</b>          |                | Coeff.                                     | SE     | p      | C'                  | Coeff.                           | SE     | p               |
| X LD Block 1 (rs1558902:A) | a              | 0.0062                                     | 0.0028 | 0.0289 | C'                  | 0.0706                           | 0.1112 | 0.4940          |
| M (BMI)                    |                | -                                          | -      | -      | b                   | 14.6063                          | 3.7939 | <0.001          |
| Constant                   | i <sub>m</sub> | 0.5696                                     | 0.0253 | <0.001 | i <sub>y</sub>      | -9.0536                          | 2.5021 | <0.001          |
|                            |                | R <sup>2</sup> =0.0519, F=4.1580, p<0.001  |        |        |                     | R <sup>2</sup> =0.1593, p<0.001  |        |                 |
|                            |                | Coeff.                                     | SE     | p      |                     | Coeff.                           | SE     | 95% CI          |
| <b>Moderation</b>          |                |                                            |        |        |                     |                                  |        |                 |
| W (sex)                    |                | -                                          | -      | -      | W*M female          | 0.0751                           | 0.0389 | 0.0053 - 0.1594 |
|                            |                |                                            |        |        | male                | 0.0595                           | 0.0313 | 0.0041 - 0.1289 |
|                            |                |                                            |        |        |                     | Index = -0.0156                  |        |                 |

† Indirect effect= a\*b; Direct effect= C'; Total effect= a\*b + C'
