# Supplementary material for: Sex and Race Differences in Obesity-Related Genetic Susceptibility and Risk of Cardiometabolic Disease in Older US Adults
Source: PubMed Central journal article supplement (PMC10709778; doi:10.1001/jamanetworkopen.2023.47171), 2023-12-08
Supplement: jamanetwopen-e2347171-s002.pdf [file jamanetwopen-e2347171-s002.pdf]

## Data Sharing Statement

Yu. Sex and Race Differences in Obesity-Related Genetic Susceptibility and Risk of Cardiometabolic Disease in Older US Adults. *JAMA Netw Open*. Published December 11, 2023. doi:10.1001/jamanetworkopen.2023.47171

### Data

**Data available:** Yes

**Data types:** Deidentified participant data, Data (not involving human participants), Data dictionary

**How to access data:** [nmda@uab.edu](mailto:nmda@uab.edu) or [kakaiser@uab.edu](mailto:kakaiser@uab.edu)

**When available:** With publication

### Supporting Documents

**Document types:** Informed consent form

**How to access documents:** <http://www.regardsstudy.org>.

**When available:** With publication

### Additional Information

**Who can access the data:** The data will be made available to researchers whose proposed use of the data has been approved.

**Types of analyses:** The data will be made available for a specified purpose.

**Mechanisms of data availability:** The data will be made available after approval of a proposal.
